# Supplementary material for: Immunoregulatory Actions of Epithelial Cell PPAR γ at the Colonic Mucosa of Mice with Experimental Inflammatory Bowel Disease
Source: PLoS One. 2010 Apr 20;5(4):e10215. doi: 10.1371/journal.pone.0010215 (PMC2857885; doi:10.1371/journal.pone.0010215)
Supplement: Table S3 — DNA replication (KEGG) genes differentially expressed on day 7 of DSS challenge in VC- mice. Log fold-change in gene expression on day 7 after DSS challenge in VC- and VC+ mice. Degree of differential expression of these genes is statistically significant for VC- mice (suggested by asterisk). Corresponding fold changes in VC+ mice are not statistically significant. The genes are down-regulated in VC- mice. (0.02 MB XLS) [file pone.0010215.s010.xls]

## Sheet: day7logFC_pathway_03030
KEGG pathway: DNA replication
Probe Set ID	Gene	WT*	VC+
1439269_x_at	minichromosome maintenance deficient 7 (S. cerevisiae)	-1.2109	0.245224
1417947_at	proliferating cell nuclear antigen	-0.852206	0.0446027
1419397_at	polymerase (DNA directed), alpha 1	-2.01594	0.430039
1448369_at	polymerase (DNA directed), alpha 2	-0.862315	0.201241
1456055_x_at	polymerase (DNA directed), delta 1, catalytic subunit	-0.976343	0.128203
1427094_at	polymerase (DNA directed), epsilon 2 (p59 subunit)	-1.40909	0.412717
1418369_at	DNA primase, p49 subunit	-2.36944	-0.513851
1421015_s_at	polymerase (DNA directed), epsilon 3 (p17 subunit)	-0.930619	0.205883
1448938_at	replication protein A3	-1.25239	-0.119516
1423700_at	replication factor C (activator 1) 3	-1.25203	0.0999502
1438161_s_at	replication factor C (activator 1) 4	-2.16118	-0.10258
