# Supplementary material for: Immunoregulatory Actions of Epithelial Cell PPAR γ at the Colonic Mucosa of Mice with Experimental Inflammatory Bowel Disease
Source: PLoS One. 2010 Apr 20;5(4):e10215. doi: 10.1371/journal.pone.0010215 (PMC2857885; doi:10.1371/journal.pone.0010215)
Supplement: Table S4 — Genes of the KEGG pathway "Aminosugar and nucleotide sugar metabolism" are differentially expressed on day 7 of DSS challenge in VC- mice. Log fold-change in gene expression on day 7 after DSS challenge in VC- and VC+ mice. Degree of differential expression of these genes is statistically significant for VC- mice (suggested by asterisk). Corresponding fold changes in VC+ mice are not statistically significant. (0.02 MB XLS) [file pone.0010215.s011.xls]

## Sheet: day7logFC_pathway_00520
KEGG pathway: Amino sugar and nucleotide sugar metabolism
Probe Set ID	Gene	WT*	VC+
1420080_a_at	glutamine fructose-6-phosphate transaminase 1	-1.65477	-0.518828
1449024_a_at	hexosaminidase A	0.749559	-0.0892533
1450107_a_at	renin binding protein	1.50329	0.563075
1455065_x_at	glucosamine-6-phosphate deaminase 1	1.66626	0.310171
1455583_at	glucosamine	-2.69192	-0.867567
1453283_at	phosphoglucomutase 1	-0.939769	0.154596
1417941_at	N-acetylneuraminic acid phosphatase	-1.43733	-0.726632
1455798_at	galactokinase 2	-0.886445	-0.279373
1429519_at	fucose-1-phosphate guanylyltransferase	-1.22454	-0.984673
1428228_at	phosphoglucomutase 3	-1.71461	-0.220508
1437986_x_at	fucokinase	-1.61483	-0.103743
